# FREE Online Subscription to *Psychiatric Services* for APA Resident-Fellow Members (RFMs)!

American Psychiatric Association Resident-Fellow Members (RFMs) can receive a free online subscription to *Psychiatric Services*.

Visit [ps.psychiatryonline.org](http://ps.psychiatryonline.org) for full-text access to all of the content in this highly ranked, peer-reviewed monthly journal. *Psychiatric Services* focuses on service delivery in organized systems of care, evolving best practices, and federal and state policies that affect the care of people with mental illnesses.

**Please visit [ps.psychiatryonline.org](http://ps.psychiatryonline.org) and log in with your APA username and password.**

Psychiatry residents who are not currently APA Resident-Fellow Members should consider membership in the American Psychiatric Association. The benefits provided to residents are an example of how the APA serves the needs of its members throughout their careers. The low introductory dues APA extends to RFMs are even waived for the first year. Please visit [www.psychiatry.org/join-apa](http://www.psychiatry.org/join-apa) for more information.

AH1818A

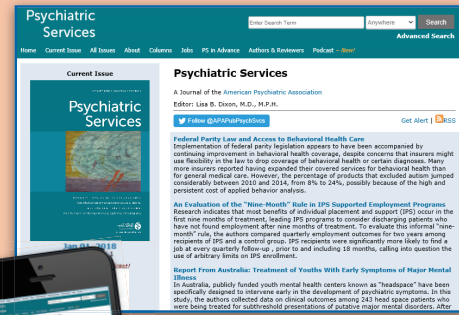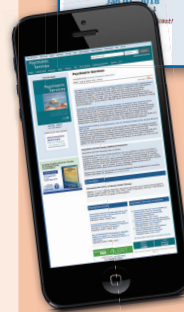

Tune in to our monthly podcast.

**PSYCHIATRIC SERVICES**  
FROM PAGES TO PRACTICE

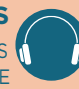

AMERICAN  
**PSYCHIATRIC  
ASSOCIATION**  
PUBLISHING

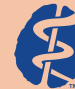

Follow @APAPubPsychSvcs

[appi.org](http://appi.org) • Email: [appi@psych.org](mailto:appi@psych.org) • Toll-Free: 1-800-368-5777

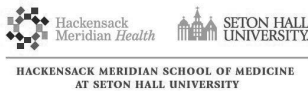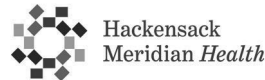

## Department of Psychiatry

With the continued growth of our Department of Psychiatry and our New General Psychiatry Residency Programs at Ocean Medical Center and Jersey Shore University Medical Center our vision for Behavioral Health is Bright.

**Hackensack Meridian Health** is a leading not-for-profit health care network in New Jersey offering a complete range of medical services, innovative research, and life enhancing care aiming to serve as a national model for changing and simplifying health care delivery through partnerships with innovative companies and focusing on quality and safety.

Through a partnership between Hackensack Meridian Health and Seton Hall University, the School of Medicine will re-define graduate medical education, research, and clinical practice; reverse the critical physician shortage in both the New York/New Jersey metropolitan area and the nation; and stimulate economic development in northern New Jersey.

The School of Medicine will be the anchor in the development of a comprehensive health sciences campus that will also include research facilities and biotechnology endeavors – all in service of educating tomorrow's doctors, discovering novel therapies, and facilitating compassionate and effective healthcare that will meet the ever-changing needs of tomorrow's patients.

The School of Medicine will be the cornerstone of a dynamic venue for the exchange of ideas, the development of healthcare and research thought leaders and practitioners, and the discovery of novel therapies to meet the medical challenges of the future.

"Ocean Medical Center's psychiatry program will be a community-based program," said Ramon Solkhah, M.D., program director for psychiatry as well as founding Chair of Psychiatry & Behavioral Health at the Hackensack Meridian School of Medicine at Seton Hall University. "Our new psychiatry residency program will improve clinical care and ultimately encourage future health care leaders to build practices in the Jersey Shore area."

As the area's premier provider of psychiatric services, **Hackensack Meridian Behavioral Health Services** has provided comprehensive mental health and substance abuse services to the residents of Monmouth, Ocean, Middlesex, and Bergen Counties for over forty years. Due to continued growth and expansion, we are currently accepting applications for Psychiatrists to join our Mental Health and Addiction Interdisciplinary Teams in the following positions:

- **Consultation Liaison Psychiatrists:** Jersey Shore University Medical Center (Neptune, NJ) and Riverview Medical Center (Red Bank, NJ) and Hackensack University Medical Center (Hackensack, NJ)
- **Staff Psychiatrist for Adult Inpatient Unit:** Jersey Shore University Medical Center (Neptune, NJ) and Riverview Medical Center (Red Bank, NJ) and Hackensack University Medical Center (Hackensack, NJ)
- **Outpatient Child & Adolescent Psychiatrist:** Jersey Shore University Medical Center (Neptune, NJ) and Hackensack University Medical Center (Hackensack, NJ)
- **Medical Director/Section Chief, Child & Adolescent Psychiatry:** Jersey Shore University Medical Center (Neptune, NJ)
- **Outpatient General Psychiatrist:** Jersey Shore University Medical Center (Neptune, NJ), Riverview Medical Center (Red Bank, NJ), and Raritan Bay Medical Center (Perth Amboy, NJ)
- **Medical Director of Adult Inpatient Unit Riverview (Red Bank, NJ)**
- **Emergency Psychiatry:** Raritan Bay Medical Center (Perth Amboy, NJ)
- **Geriatric Psychiatry – Hackensack University Medical Center (Hackensack, NJ)**
- **Outpatient/Consultation Liaison Psychiatrist – JFK (Edison, NJ)**
- **Per Diem/Tele-psychiatry – Hackensack University Medical Center (Hackensack, NJ)**
- **Staff Consultation Psychiatry – Bayshore Medical Center, (Holmdel, NJ)**

In addition to our collegial work environment, we offer a highly competitive compensation package which includes: medical/dental plans, 403(b) retirement plan, and relocation assistance.

**For immediate consideration, please contact Renee Theobald, at: [Renee.Theobald@hackensackmeridian.org](mailto:Renee.Theobald@hackensackmeridian.org) or call: 732 751-3597**

## Subscription and Business Information

*The American Journal of Psychiatry*, ISSN 0002-953X, is published monthly by the American Psychiatric Association.

The American Psychiatric Association does not hold itself responsible for statements made in its publications by contributors or advertisers. Unless so stated, material in *The American Journal of Psychiatry* does not reflect the endorsement, official attitude, or position of the American Psychiatric Association or of the Journal's Editorial Board.

Periodicals postage paid at Washington, DC, and additional mailing offices. POSTMASTER: Send address changes to *The American Journal of Psychiatry*, Circulation Department, American Psychiatric Association, 800 Maine Avenue, S.W., Suite 900, Washington, D.C. 20024.

### Editorial Office

*American Journal of Psychiatry*  
American Psychiatric Association  
800 Maine Avenue, S.W., Suite 900  
Washington, D.C. 20024  
E-mail: [ajp@psych.org](mailto:ajp@psych.org)

### Customer Service

Phone: (800) 368-5777 (toll-free)  
E-mail: [appi@psych.org](mailto:appi@psych.org)

### APA Member Subscription Services

Phone: (888) 35-PSYCH (toll-free)

### Subscriptions

Per year: individual \$348.00,  
international \$523.00

Institutional subscriptions are tier priced. For institutional site license or pricing information, contact (202) 559-3729 or [institutions@psych.org](mailto:institutions@psych.org).

*Additional subscription options, including single issues and student rates*  
Contact Customer Service

### Advertising

*Pharmaceutical Print and Online Advertising*  
Frank Cox, Kathleen Harrison, Tim Wolfinger  
Pharmaceutical Media, Inc.  
30 East 33rd Street  
New York, NY 10016  
Phone: (212) 904-0379  
E-mail: [twolfinger@pminy.com](mailto:twolfinger@pminy.com)

### *Nonpharmaceutical and Online Sales*

Eamon Wood  
Pharmaceutical Media, Inc.  
E-mail: [ewood@pminy.com](mailto:ewood@pminy.com)  
(see address and phone above).

### Permissions and Reprints

Material published in the journals of the American Psychiatric Association and American Psychiatric Association Publishing is protected by copyright and all rights are reserved. Material may not be reproduced in any form or by any means without written permission from the copyright owner. For permission to reproduce material published by APA, please visit <http://www.appi.org/customer-service/permissions> for more information. Permission can also be secured through the Copyright Clearance Center ([www.copyright.com](http://www.copyright.com)).

APA does not require that permission be obtained for the photocopying of isolated articles for nonprofit classroom or library reserve use; all fees associated with such permission are waived. This consent does not extend to other kinds of copying, such as copying for general distribution, for advertising or promotional purposes, for creating new collective works, or for resale. Requests for commercial distribution should be directed to (202) 609-7075.

For bulk reprints, please contact Jane Cha, (202) 609-7075; e-mail: [jcha@psych.org](mailto:jcha@psych.org).

Indexed in Abstracts for Social Workers, Academic Abstracts, Biological Abstracts, Chemical Abstracts, Chicago Psychoanalytic Literature Index, Cumulative Index to Nursing Literature, Excerpta Medica, Hospital Literature Index, Index Medicus, International Nursing Index, Nutrition Abstracts, Psychological Abstracts, Science Citation Index, Social Science Source, and Social Sciences Index.

Pages are produced by Sheridan Journal Services (Waterbury, VT) and printed by Sheridan NH (Hanover, NH) on acid-free paper effective with Volume 169, Number 1, January 2012.

© 2019 American Psychiatric Association.

## Student Mental Health

*A Guide for Psychiatrists,  
Psychologists, and Leaders  
Serving in Higher Education*

Edited by Laura Weiss Roberts, M.D., M.A.

### Student Mental Health

is both down-to-earth and aspirational, providing evidence and best practices to ensure greater mental health on campus, while stimulating conversation about how to ensure and optimize the value of higher education through thoughtful, sophisticated approaches to student mental health.

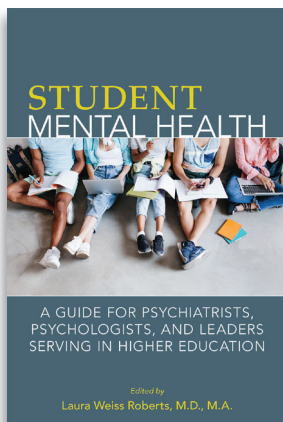

The chapter authors address life transitions and the university student experience, as well as the challenges of caring for university students with mental health issues.

The book has positive strategies, including ways to foster mental health for distinct university student populations.

2018 • 530 pages • ISBN 978-1-61537-114-3 • Paperback • \$62.00 • Item #37114  
2018 • 530 pages • ISBN 978-1-61537-194-5 • eBook • \$49.95 • Item #37194

AMERICAN  
PSYCHIATRIC  
ASSOCIATION  
PUBLISHING

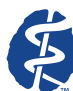

www.appi.org  
Toll Free: 1-800-368-5777  
Email: appi@psych.org

20% Discount • American Psychiatric Association Members  
25% Discount • APA Resident-Fellow Members

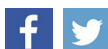

AH1846

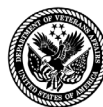

# Choose VA

## VA BOSTON HEALTHCARE SYSTEM (VABHS) IS RECRUITING FOR TWO SENIOR LEADERSHIP POSITIONS IN MENTAL HEALTH

VABHS is dually affiliated with Harvard Medical School (HMS) and Boston University School of Medicine (BUSM) and serves as the major tertiary referral center for Veterans from throughout New England. VABHS provides inpatient, residential, and outpatient medical-surgical and mental health services across three major campuses, five community-based outpatient clinics, and several residential rehabilitation facilities. VABHS provides mental health care to 13,000 Veterans in a full spectrum of inpatient (126 beds), residential (131 beds), and outpatient programs. VABHS is the nation's largest recipient of VA research funds with particular strength in neuroscience. VABHS is a host site for numerous national research programs, including two divisions of the National Center for PTSD, the Million Veteran Program (the world's largest genomic biorepository), VA's contribution to All of Us, and brain banks for CTE, PTSD, and Alzheimer's disease. VABHS hosts more than 3400 trainees annually in medicine, nursing, and the allied health professions.

### Director, Mental Health, VA Boston Healthcare System

VABHS is seeking a board-certified psychiatrist or a psychologist to serve as Director of Mental Health. The primary responsibility of the Director, Mental Health is the organization and oversight of mental health care delivered by psychiatrists, psychologists, social workers, and advanced practice nurses. In collaboration with the Associate Chiefs of Staff for Research and Education, chief of psychiatry and chief of psychology, the Director of Mental Health also supports research, teaching, and faculty development for faculty and trainees in psychiatry at HMS and BUSM. We seek an individual with demonstrated leadership skills, clinical excellence, a commitment to education, and the ability to catalyze the growth of clinical and basic research. The ideal candidate should have a national reputation and academic accomplishments consistent with appointment as associate professor or professor at HMS or BUSM. The incumbent will select primary appointment at one of the principal affiliates with secondary appointment at the other.

Please send a cover letter, CV, and list of references to:  
[VABostonDirectorMentalHealthsearch@va.gov](mailto:VABostonDirectorMentalHealthsearch@va.gov)

### Head, VA-Harvard Medical School Dept of Psychiatry

VHABHS is seeking a board-certified psychiatrist to serve as Head, VA-HMS Department of Psychiatry, one of seven HMS appointing departments of Psychiatry. The principal administrative responsibility of the VA-HMS Department Head is the appointment and promotion of HMS faculty and staff in psychiatry at VABHS. In this capacity, the VA-HMS Department Head serves on the HMS Department of Psychiatry Executive Committee with heads of psychiatry from six other HMS teaching hospitals. In collaboration with the VABHS Director of Mental Health and the Associate Chiefs of Staff for Research and Education, the VA-HMS Department Head also supports research, teaching, evidence-based clinical care, and faculty development for more than 200 HMS faculty and trainees in psychiatry at VABHS. We seek an individual with a vibrant psychiatry or neuroscience research program, demonstrated leadership skills, and the ability to catalyze the growth of clinical and basic research related to the mental health disorders of Veterans. The ideal candidate should have a national reputation and academic accomplishments commensurate with appointment as professor at HMS.

Please send a cover letter, CV, and list of references to:  
[VAHarvardPsychiatryChairsearch@va.gov](mailto:VAHarvardPsychiatryChairsearch@va.gov)

Individuals with appropriate qualifications may apply to either or both of these federal government positions.

Salary with excellent benefits is competitive and based on qualifications and experience. Recruitment/Relocation incentives will be considered. Unrestricted licensure in any state and US citizenship are required.

VABHS is an equal opportunity employer, and all qualified applicants will receive consideration for employment without regard to race, color, religion, sex, sexual orientation, pregnancy and pregnancy-related conditions, gender identity, national origin, disability status, protected veteran status, or any other characteristic protected by law.

# Psychiatrists Professional Liability Insurance

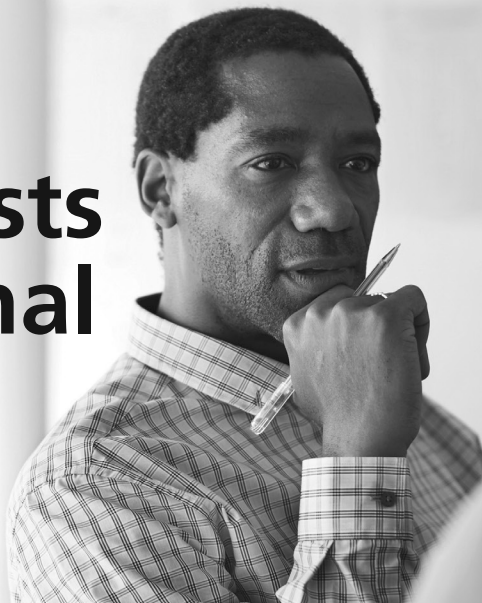

## Discounts Offered Include:

- 15% NEW POLICYHOLDER DISCOUNT\***  
(must be claims free for the last 6 months)
- Up to 50% New Doctor Discount** (for those who qualify)
- 10% Claims Free Discount** (for those practicing 10 years, after completion of training, and remain claims free)
- 50% Resident-Fellow Member Discount**
- 15% Child and Adolescent Psychiatrist Discount** (for those whose patient base is more than 50% children and adolescents)
- 50% Part-time Discount** (for up to 20 client hours a week or less)
- 5% Risk Management Discount** (for 3 hours of CME)

*\*Where allowable by law and currently not available in AK or NY.  
(Above Discounts and Coverage Features are subject to individual state approval.)*

**40**  
YEARS

For over 40 years we have provided exceptional protection and have a reputation for outstanding customer service. Our extensive years of experience and industry knowledge allows us to help you by providing worry free coverage so you can concentrate on what you do best – helping people help themselves. When it comes to caring about people, we have a lot in common.

## Our Psychiatrists Professional Liability Program Provides:

- Limits up to \$150,000 in Defense Expenses related to Licensing Board Hearings and other Proceedings
- Up to \$150,000 in Fire Legal Liability Coverage
- Up to \$100,000 in Medical Payments for Bodily Injury
- Up to \$25,000 for First Party Assault and Battery Coverage
- Up to \$25,000 for Information Privacy Coverage (HIPAA)
- Up to \$15,000 in Emergency Aid Coverage
- Insured's Consent to Settle required in the settlement of any claim – No arbitration clause
- Telepsychiatry, ECT, Forensic Psychiatry Coverage
- Risk Management Hotline with 24/7 Service for Emergencies

Visit us at [apamalpractice.com](http://apamalpractice.com) or call **877.740.1777** to learn more.

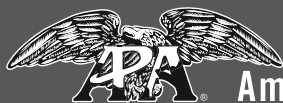

**American Professional Agency**

LEADERS IN PSYCHIATRIC MEDICAL LIABILITY INSURANCE

Endorsed by:

AMERICAN  
PSYCHIATRIC  
ASSOCIATION

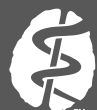

Source: http://ajp.psychiatryonline.org/doi/suppl/10.1176/ajp.2019.176.issue-1/suppl_file/back.pdf
