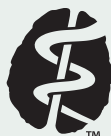

## Officers 2018–2019

### President

Altha J. Stewart, M.D.

### President-Elect

Bruce J. Schwartz, M.D.

### Treasurer

Gregory W. Dalack, M.D.

### Secretary

Philip R. Muskin, M.D., M.A.

### Assembly

#### Speaker

James R. Batterson, M.D.

#### Speaker-Elect

Paul J. O'Leary, M.D.

#### Recorder

Seeth Vivek, M.D.

### Office of the CEO and Medical Director

#### CEO and Medical Director

Saul Levin, M.D., M.P.A., F.R.C.P.-E.

### Board of Trustees

Renée L. Binder, M.D.

Jenny L. Boyer, M.D., Ph.D., J.D.

Rana Elmaghraby, M.D.

Anita S. Everett, M.D.\*

Tanuja Gandhi, M.D.

Ayana Jordan, M.D., Ph.D.

Annette M. Matthews, M.D.

Maria A. Oquendo, M.D., Ph.D.

Roger Peele, M.D.

Vivian B. Pender, M.D.

Eric M. Plakun, M.D.

Richard F. Summers, M.D.

Ramaswamy Viswanathan, M.D., D.M.Sc.

Cheryl D. Wills, M.D.

Melinda Young, M.D.

\* At the conclusion of the APA Annual Meeting in May 2018, which corresponded with the conclusion of her Presidential term, Dr. Everett began service on the APA Board of Trustees as Immediate Past President. Previous issues of the *Journal* did not reflect this update.

## Editorial Board

### Editor

Ned H. Kalin, M.D.

### Deputy Editors

Elisabeth Binder, M.D., Ph.D.

Kathleen T. Brady, M.D., Ph.D.

David A. Lewis, M.D.

Daniel S. Pine, M.D.

Carolyn Rodriguez, M.D.

Madhukar Trivedi, M.D.

### Associate Editors

Huda Akil, Ph.D.

Melissa Arbuckle, M.D., Ph.D.

Alan Brown, M.D., M.P.H.

Tyrone Cannon, Ph.D.

Karl Deisseroth, M.D., Ph.D.

Benjamin G. Druss, M.D., M.P.H.

Felton Earls, M.D.

Graham J. Emslie, M.D.

Javier I. Escobar, M.D., M.Sc.

Julie L. Fudge, M.D.

Qiyong Gong, M.D., Ph.D.

Helena Hansen, M.D., Ph.D.

Yasmin Hurd, Ph.D.

Clinton D. Kiltz, Ph.D.

Carlos López Jaramillo, M.D., M.Sc.,  
Ph.D.

Joan L. Luby, M.D.

Constantine G. Lyketsos, M.D., M.H.S.

Helen S. Mayberg, M.D., F.R.C.P.C.

Terrie E. Moffitt, Ph.D.

Rajesh Narendran, M.D.

Charles B. Nemeroff, M.D., Ph.D.

Roy Perlis, M.D.

Bryan L. Roth, M.D., Ph.D.

Alan F. Schatzberg, M.D.

Anita Thapar, M.B.B.Ch., F.R.C.Psych.,  
Ph.D., F.Med.Sci.

Mauricio Tohen, M.D., Dr.PH., M.B.A.

Giulio Tononi, M.D., Ph.D.

Eduard Vieta, M.D., Ph.D.

John T. Walkup, M.D.

### Editors Emeriti

Nancy C. Andreasen, M.D., Ph.D.

Robert Freedman, M.D.

### Former Editors

Amariah Brigham, M.D., 1844–1849

T. Romeyn Beck, M.D., 1849–1854

John P. Gray, M.D., 1854–1886

G. Alder Blumer, M.D., 1886–1894

Richard Dewey, M.D., 1894–1897

Henry M. Hurd, M.D., 1897–1904

Edward N. Brush, M.D., 1904–1931

Clarence B. Farrar, M.D., 1931–1965

Francis J. Braceland, M.D., 1965–1978

John C. Nemiah, M.D., 1978–1993

### Editorial Staff

#### Executive Editor

Michael D. Roy

#### Senior Editor

John J. Guardiano, Ph.D.

#### Production Manager

Susan Westrate

#### Assistant Editor

Angela Moore

#### Online Content Manager

Michael Pogachar

#### Editorial Support Services Manager

Heidi Koch

#### Editorial Assistant

Linda LaCour

#### Editorial Assistant/ Permissions Coordinator

Efrem Tuquabo

#### Spanish Content Manager

Sergi Casals, M.A.

#### Publisher

John McDuffie
