# YOU CAN SAVE LIVES.

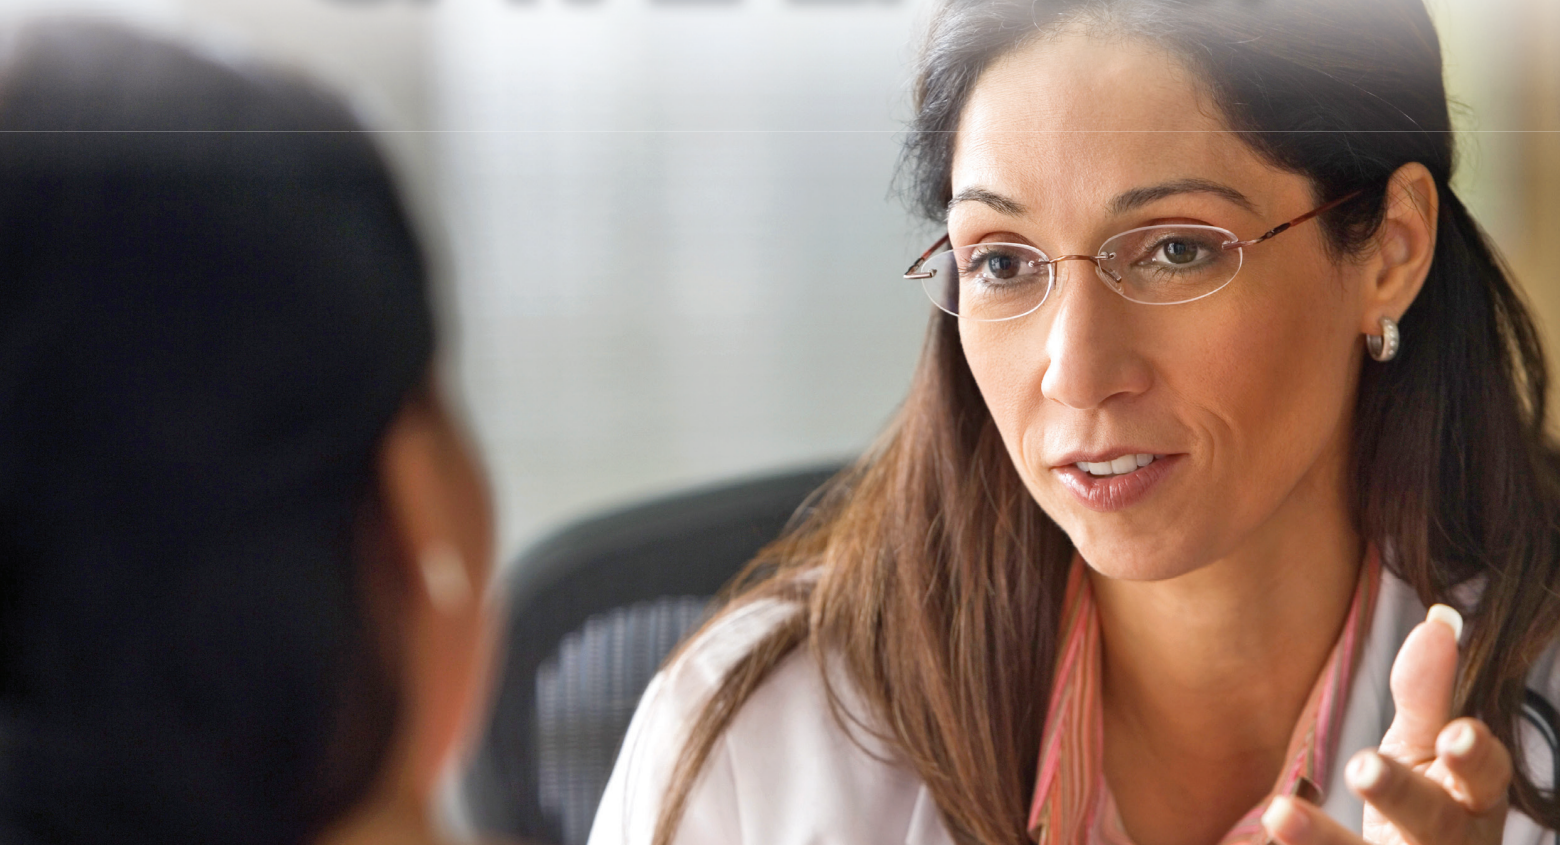

**Treating tobacco use is an important part of mental health treatment.**

**Double your patients' chances of quitting with counseling and medication.**

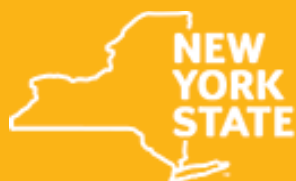

**Department  
of Health**

**[TalkToYourPatients.health.ny.gov](http://TalkToYourPatients.health.ny.gov)**

U.S. Dept. of Health and Human Services, Public Health Service, Treating Tobacco Use and Dependence  
Clinical Practice Guideline 2008 Update

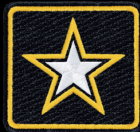

U.S. ARMY

## USE YOUR SKILLS TO HEAL AS A U.S. ARMY PSYCHIATRIST

Provide care that makes a difference to our Soldiers and their families. As a psychiatrist on the U.S. Army or Army Reserve health care team, you'll practice in a collaborative environment, with no overhead or concerns about malpractice insurance. You may be eligible for a bonus, a full-tuition scholarship with a monthly stipend of more than \$2,200, specialized training assistance or qualify for an education loan repayment program. If you decide to serve in the Army Reserve, you may continue to work in your community and serve when needed.

For more information about a career in Army Medicine, visit [healthcare.goarmy.com/oa18](https://healthcare.goarmy.com/oa18)

# The American Journal of Psychiatry

## Residents' Journal

[ajp.psychiatryonline.org/loi/ajp-rj](http://ajp.psychiatryonline.org/loi/ajp-rj)

### December 2018

- 2 Lamotrigine: Pharmacology, Clinical Utility, and New Safety Concerns**  
Jeffrey M. Mufson, M.D.  
*Examining drug efficacy in bipolar disorder and recent FDA alerts*
- 5 The Life of a New York City Ballet Principal: A Sports Psychiatric View Through the Opera Glass**  
Badr Ratnakaran, M.B.B.S.  
*Emphasizing the importance of a niche field*
- 6 Beyond the Suicides: 13 Reasons Why and Its Potential Impact on School Shootings**  
Jessica Patrizi, B.S.  
*Assessing the potential risk for copycat behavior*
- 7 From Badge to Coat**  
Laura G. Goetz, M.S.  
*Ascertaining challenges in physician-patient interactions*
- 8 Annihilation and the Books of the Southern Reach Trilogy**  
Reviewed by Aaron Winkler, M.D.
- 9 Residents' Resources**
- 10 Upcoming Themes**

**The Residents' Journal** is an e-publication that serves as a forum for sharing ideas and experiences in training, clinical practice, research, and careers.

**The Residents' Journal** considers manuscripts authored by medical students, resident physicians, and fellows. For information about submitting manuscripts, visit the **Author Resources** page online: [https://ajp.psychiatryonline.org/residents\\_journal/rj\\_ifora](https://ajp.psychiatryonline.org/residents_journal/rj_ifora).

### 2018–2019 Editorial Board

**Editor-in-Chief:** Oliver Glass, M.D.

**Senior Deputy Editor:** Shapir Rosenberg, M.D.

**Deputy Editor:** Matthew Edwards, M.D.

**Deputy Editor:** Anna Kim, M.D.

**Deputy Editor/Podcast Editor:**  
Lindsay Lebin, M.D.

**Associate Editors:** Carol Chan, M.D.  
Alexander Cole, M.D.  
Jason Garner, M.D., J.D.  
David Latov, M.D.  
Elon Richman, M.D.

**Culture Editor:** Erik Bayona, M.D.

**Culture Editor/Social Media Editor:**  
Somya Abubucker, M.D.

### CALL FOR PAPERS

All article types are welcome; all submissions will be peer reviewed.

To submit an article, go to <https://mc.manuscriptcentral.com/appi-ajp>, and select a manuscript type for AJP Residents' Journal.

 [Facebook.com/AJPResidentsJournal](https://www.facebook.com/AJPResidentsJournal)

 [@AJP\\_ResJournal](https://twitter.com/AJP_ResJournal)

AMERICAN  
PSYCHIATRIC  
ASSOCIATION

PUBLISHING

[www.appi.org](http://www.appi.org)

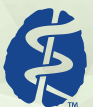

# THE AMERICAN PSYCHIATRIC ASSOCIATION

800 Maine Avenue, S.W., Suite 900, Washington, D.C. 20024

(888) 357-7924 (toll-free inside the U.S. and Canada)

web site: [www.psychiatry.org](http://www.psychiatry.org) • e-mail: [apa@psych.org](mailto:apa@psych.org)

## Chairpersons of Councils, Committees, and Task Forces

### Standing Committees

|                             |                             |
|-----------------------------|-----------------------------|
| <b>Bylaws</b>               | Esperanza Diaz, M.D.        |
| <b>Elections</b>            | Joseph A. Cheong, M.D.      |
| <b>Ethics</b>               | Ezra E.H. Griffith, M.D.    |
| <b>Finance and Budget</b>   | Ann Marie T. Sullivan, M.D. |
| <i>Audit</i>                | Gregory W. Dalack, M.D.     |
| <i>Investment Oversight</i> | David Fassler, M.D.         |
| <b>Joint Reference</b>      | Bruce J. Schwartz, M.D.     |
| <b>Membership</b>           | William Arroyo, M.D.        |
| <b>Nominating</b>           | Anita S. Everett, M.D.      |
| <b>Tellers</b>              | Jose P. Vito, M.D.          |

### Non-Standing Committee

|                             |                              |
|-----------------------------|------------------------------|
| <b>Conflict of Interest</b> | Philip R. Muskin, M.D., M.A. |
|-----------------------------|------------------------------|

### Councils

#### Council on Addiction Psychiatry

Andrew J. Saxon, M.D.

#### Council on Advocacy and Government Relations

Patrick S. Runnels, M.D.

*Advocacy and Litigation Funding*

Bhasker J. Dave, M.D.

#### Council on Children, Adolescents, and Their Families

Gabrielle Shapiro, M.D.\*

#### Council on Communications

Carol A. Bernstein, M.D.

#### Council on Consultation-Liaison Psychiatry

David F. Gitlin, M.D.

#### Council on Geriatric Psychiatry

Robert P. Roca, M.D.

#### Council on Healthcare Systems and Financing

Harsh K. Trivedi, M.D.

*Integrated Care*

Ken C. Hopper, M.D.

*RBRVS, Codes and Reimbursement*

Gregory G. Harris, M.D.

*Reimbursement for Psychiatric Care*

Laurence H. Miller, M.D.

*Telepsychiatry*

James H. Shore, M.D.

#### Council on International Psychiatry

Bernardo Ng, M.D.

*Chester Pierce Human Rights Award Committee*

James L. Griffith, M.D.

#### Council on Medical Education and Lifelong Learning

Mark H. Rapaport, M.D.

*Scientific Program*

Jacqueline M. Feldman, M.D.

*Scientific Program—IPS (Oct. to Oct. tenure)*

Eric Yarbrough, M.D.

*Vestermark Award Committee*

Lowell D. Tong, M.D.

#### Council on Minority Mental Health and Health Disparities

Christina V. Mangurian, M.D.

#### Council on Psychiatry and Law

Debra A. Pinals, M.D.

*Judicial Action*

Marvin S. Swartz, M.D.

#### Council on Quality Care

Grayson S. Norquist, M.D.

*Mental Health Information Technology*

Brent Nelson, M.D.

*Quality and Performance Measurement*

Carol Alter, M.D.\*

*Practice Guidelines*

Daniel J. Anzia, M.D.

#### Council on Research

Dwight L. Evans, M.D.

*Psychiatric Dimensions of Disasters*

Joshua C. Morganstein, M.D.

\* Has served in role since conclusion of APA Annual Meeting, May 2018. Previous issues of the *Journal* had not updated the position holder.

# Go Online

Visit [ajp.psychiatryonline.org](http://ajp.psychiatryonline.org) for these features!

## **AJP in Advance** *Discover the latest research advances before they appear in print*

### **A Randomized Trial Comparing Extended-Release Injectable Suspension and Oral Naltrexone, Both Combined With Behavioral Therapy, for the Treatment of Opioid Use Disorder**

The extended-release injectable form of naltrexone, combined with behavioral therapy, has significant clinical benefits over oral naltrexone plus behavioral therapy for the treatment of patients with opioid dependence.

### **Mega-Analysis of Gray Matter Volume in Substance Dependence: General and Substance-Specific Regional Effects**

As data from imaging studies accrue, it has become possible to evaluate the replicability of associations across studies. Mackey and colleagues provide such an evaluation for studies of substance use disorders. They report data from structural magnetic resonance imaging studies in more 3,000 individuals, which reveals widespread perturbations in many brain regions. This suggests structural correlates of substance use disorders are readily observable.

## **AJP CME** *Earn CME credit: 3 courses per issue*

This month's courses appear on pages 83–86.

Each short course is based on one article in this issue and can earn up to 1 *AMA PRA Category 1 Credit*<sup>™</sup>. CME credit is issued only **online**, and a paid subscription to AJP's CME course program is required.

Visit [psychiatryonline.org/cme](http://psychiatryonline.org/cme) and click on the "American Journal of Psychiatry" tab.

## **AJP Multimedia** *Access Audio or Video for highlights of each issue*

**In AJP Audio this month, new Editor-in-Chief Ned Kalin, M.D., discusses his vision for the Journal.**

In this month's video, Deputy Editor Daniel S. Pine, M.D., discusses the articles "Schizophrenia Polygenic Risk Score as a Predictor of Antipsychotic Efficacy in First-Episode Psychosis" and "Electroencephalographic Biomarkers for Treatment Response Prediction in Major Depressive Illness: A Meta-Analysis."

## **History of Psychiatry** *Revisit the field's rich history through the AJP Archive*

100 years ago this month, and decades before the first edition of DSM, E.E. Southard, M.D., presents a summary of recent American classifications of mental diseases.

Psychiatry Online

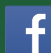

@AmJPsychiatry

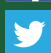

AMERICAN  
PSYCHIATRIC  
ASSOCIATION  
PUBLISHING

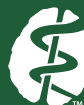

[www.appi.org](http://www.appi.org)  
1-800-368-5777  
[appi@psych.org](mailto:appi@psych.org)
