## PERSPECTIVAS

### NOTA DEL EDITOR

- 1** **Saludos**  
*Ned H. Kalin, M.D.* **AUDIO**

### EDITORIALE

- 3** **Puntuaciones de riesgo poligénico en investigación clínica de esquizofrenia**  
*Daniel R. Weinberger, M.D.*

### TRATAMIENTO EN PSIQUIATRÍA

- 5** **Trastornos de control de impulsos en la enfermedad de Parkinson**  
*Daniel Weintraub, M.D., Eugenia Mamikonyan, M.S.* **CME**

### REVISIÓN Y RESEÑAS

- 12** **Pensando acerca de la esquizofrenia en la era de la medicina genómica**  
*Daniel R. Weinberger, M.D.*

## NUEVAS INVESTIGACIONES

### ARTÍCULOS

- 21** **Puntuación de riesgo poligénico de esquizofrenia como predictor de la eficacia de los antipsicóticos en el primer episodio de psicosis**  
*Jian-Ping Zhang, M.D., Ph.D., et al.* **EDITORIAL • VIDEO**  
Los pacientes con primer episodio de psicosis que tienen las puntuaciones de riesgo poligénico más altas tuvieron niveles más bajos de mejora con el tratamiento con antipsicóticos, lo que sugiere que la carga poligénica puede afectar la gravedad de la enfermedad además de reflejar el riesgo de desarrollar psicosis.
- 29** **Contribuciones conjuntas de las variaciones del número de copias poco comunes y de los SNPs comunes al riesgo de esquizofrenia**  
*Sarah E. Bergen, Ph.D., et al.* **EDITORIAL**  
La investigación de datos genéticos de más de 40.000 individuos apunta a las interacciones entre variaciones del número de copias (CNV) poco comunes y polimorfismos de nucleótido único (SNP) comunes en el riesgo de esquizofrenia. Hubo una relación aditiva entre la puntuación de riesgo poligénico y, o bien la carga total de CNV, o bien CNVs grandes.
- 36** **Contribuciones de los alelos de riesgo de esquizofrenia y de la victimización por pares en la adolescencia al desarrollo temprano de trayectorias de salud mental**  
*Lucy Riglin, Ph.D., et al.* **EDITORIAL**  
[Emotional problems that first manifest in early childhood are associated with genetic risk burden (schizophrenia risk alleles), while being bullied/victimized can alter the developmental trajectory to one of increasing emotional problems during adolescence.]
- 44** **Biomarcadores electroencefalográficos para la predicción de la respuesta al tratamiento del trastorno depresivo mayor: Un meta-análisis**  
*Alik S. Widge, M.D., Ph.D., et al.* **VIDEO**  
Las técnicas de electroencefalografía (EEG) usadas normalmente pueden no estar lo suficientemente bien desarrolladas para apoyar su uso clínico para predecir el resultado del tratamiento en la depresión.
- 57** **Marcadores de neuroimágenes estructurales multimodales del desarrollo cerebral y los síntomas de TDAH**  
*Gareth Ball, Ph.D., et al.* **CME**  
La formación del trastorno por déficit de atención e hiperactividad (TDAH) puede surgir de una combinación de varios factores clínicos, de desarrollo o cognitivos, cada uno con un fundamento neuroanatómico claro. Los patrones de neuroimágenes podrían predecir la variación fenotípica en edad y síntomas de TDAH.
- 67** **Mecanismos cerebrales de orientación de la atención después de la frustración: Asociaciones a la irritabilidad y la edad en los jóvenes**  
*Wan-Ling Tseng, Ph.D., et al.* **CME**  
La alta irritabilidad está relacionada con una mayor activación en múltiples regiones frontales-estriatales independientemente de la edad. En otras regiones, las asociaciones entre la irritabilidad y la activación fueron moderadas por la edad, de modo que las asociaciones fueron más fuertes en niños más pequeños en comparación con niños más grandes.

**CARTAS AL EDITOR**

- 77 **Comentario sobre la prevalencia y los correlatos del uso, el abuso, los trastornos por consumo y los motivos de abuso de estimulantes de prescripción en adultos en los Estados Unidos**  
*Lawrence Diller, M.D.*
- 77 **Uso indebido de estimulantes de liberación inmediata: Respuesta a Diller**  
*Wilson M. Compton, M.D., M.P.E., et al.*
- 78 **Sustancias controladas en la epidemia de polidrogas: Respuesta a Diller**  
*Robert L. DuPont, M.D., Amelia M. Arria, Ph.D.*
- 79 **El problema con el agotamiento: Una actualización del solapamiento entre el agotamiento y la depresión**  
*Renzo Bianchi, Ph.D., et al.*
- 79 **Agotamiento y depresión: ¿El mismo fenómeno o constructos que se solapan? Respuesta a Bianchi et al.**  
*Erick Messias, M.D., Ph.D., Victoria Flynn, M.D.*
- 80 **Uso de disulfiram para el tratamiento de la adicción al alcohol en pacientes con enfermedad psicótica**  
*Joseph Benjamin Williams, M.D.*

**ACTOS OFICIALES**

- 82 **Biomarcadores electroencefalográficos para la predicción de la respuesta al tratamiento del trastorno depresivo mayor**  
*Alik S. Widge, M.D., Ph.D., et al.*

**OTROS TEMAS DE INTERÉS**

- 81 **[Correction]**
- 83 **Educación Médica Continuada**

**Cubierta:** [Riglin et al. (p. 36) discuss developmental contributions of schizophrenia risk alleles and childhood peer victimization to early-onset mental health trajectories.]

**AUDIO** Article is highlighted in AJP Audio, a downloadable .mp3 file available at [ajp.psychiatryonline.org](http://ajp.psychiatryonline.org)

**EDITORIALE** Article is discussed in one of the issue's editorials

**EMC** A course covering the content of this article is available online for paid subscribers to the AJP CME Course program

**VIDEO** Article is highlighted online by Deputy Editor Daniel S. Pine, M.D.

**La Tabla de Contenidos y resúmenes de Este Número Está Disponible en Español**

*(Abstracts are also available in Spanish)*

Translation presented in collaboration with the Office of Global Health, Rutgers-Robert Wood Johnson Medical School. Support for this effort provided by ACTA Colombia.

**Translation courtesy of**

**Sergi Casals, M.A.**, Garuna, Medellín, Colombia ([www.garunaeditors.com](http://www.garunaeditors.com))

**Carlos López Jaramillo, M.D., M.Sc., Ph.D.**, Universidad de Antioquia, Medellín, Colombia

**Javier I. Escobar, M.D., M.Sc.**, Rutgers-Robert Wood Johnson Medical School

# Puntuación de riesgo poligénico de esquizofrenia como predictor de la eficacia de los antipsicóticos en el primer episodio de psicosis

Jian-Ping Zhang, M.D., Ph.D., Delbert Robinson, M.D., Jin Yu, M.S., Juan Gallego, W. Wolfgang Fleischhacker, M.D., Rene S. Kahn, M.D., Benedicto Crespo-Facorro, M.D., Javier Vazquez-Bourgon, M.D., John M. Kane, M.D., Anil K. Malhotra, M.D., Todd Lencz, Ph.D.

**Objetivo:** Los estudios farmacogenómicos de antipsicóticos típicamente han examinado efectos de polimorfismos individuales. En cambio, las puntuaciones de riesgo poligénico (PRS, por sus siglas en inglés) derivadas de estudios de asociación del genoma completo (GWAS) pueden cuantificar la influencia de miles de alelos comunes de poco efecto en una sola medida. Los autores examinaron si las puntuaciones de riesgo poligénico (PRS) para la esquizofrenia eran predictivas de la eficacia de los antipsicóticos en cuatro cohortes independientes de pacientes con primer episodio de psicosis (total M=510).

**Método:** Todos los sujetos del estudio recibieron tratamiento inicial con medicamentos antipsicóticos para el primer episodio de psicosis y todos se genotipificaron en ensayos de polimorfismos de nucleótido simple (SNP) estándar imputados al panel de referencia del Proyecto 1000 Genomas. La puntuación de riesgo poligénico (PRS) se computó con base en los resultados de los GWAS a gran escala reportados por el Consorcio de Genómica Psiquiátrica (*Psychiatric Genomics Consortium*). Los síntomas se midieron utilizando escalas de evaluación de síntomas totales al inicio del estudio y en la semana 12 o en la última visita de seguimiento antes de la deserción.

**Resultados:** En la cohorte de descubrimiento, una puntuación de riesgo poligénico (PRS) más alta predecía de forma

significativa puntuaciones de síntomas más altas en la semana 12 de seguimiento (controlando los síntomas al inicio del estudio, el sexo, la edad y el origen étnico). El umbral de la puntuación de riesgo poligénico (PRS) establecido a un valor  $p < 0,01$  dio el resultado más sólido en la cohorte de descubrimiento y se utilizó para replicar los hallazgos en las otras tres cohortes. Una puntuación de riesgo poligénico (PRS) más alta más alta predijo de forma significativa más síntomas de post-tratamiento en el análisis de réplica combinado y fue significativa individualmente en dos de las tres cohortes de réplica. En las cuatro cohortes, la puntuación de riesgo poligénico (PRS) predijo de forma significativa las puntuaciones ajustadas de los síntomas a las 12 semanas ( $r$  parcial agrupada=0,18; 3,24% de la varianza explicada). Los pacientes con una puntuación de riesgo poligénico (PRS) baja tuvieron una mayor probabilidad de responder al tratamiento que los pacientes con una puntuación de riesgo poligénico (PRS) alta (*odds ratio*=1,91 en las dos muestras caucásicas).

**Conclusiones:** Los pacientes con puntuación de riesgo poligénico (PRS) más alta para esquizofrenia tendieron a tener menos mejoría con el tratamiento con antipsicóticos. La carga de la puntuación de riesgo poligénico (PRS) puede tener utilidad potencial como biomarcador de pronóstico.

(*Am J Psychiatry* 2019; 176:21–28)

## Contribuciones conjuntas de las variaciones del número de copias poco comunes y de los SNPs comunes al riesgo de esquizofrenia

Sarah E. Bergen, Ph.D., Alexander Ploner, Ph.D., Daniel Howrigan, Ph.D., CNV Analysis Group and the Schizophrenia Working Group of the Psychiatric Genomics Consortium, Michael C. O'Donovan, M.D., Ph.D., Jordan W. Smoller, M.D., Sc.D., Patrick F. Sullivan, M.D., F.R.A.N.Z.C.P., Jonathan Sebat, Ph.D., Benjamin Neale, Ph.D., Kenneth S. Kendler, M.D.

**Objetivo:** Tanto las variaciones de número de copias (CNV) poco comunes como los polimorfismos de nucleótido simple (SNP) comunes contribuyen a la formación de la esquizofrenia, pero su relación etiológica no se ha dilucidado por completo. Los autores evaluaron un modelo aditivo en el que el riesgo de esquizofrenia requiere de menor contribución de los SNP comunes en presencia de un CNV poco común, y evaluaron las interacciones.

**Método:** Se examinaron datos genéticos de 21.094 sujetos de caso con esquizofrenia y 20.227 sujetos control del Consorcio de Genómica Psiquiátrica (*Psychiatric Genomics Consortium*). Se evaluaron tres clases de CNV poco comunes: CNV previamente asociadas a la esquizofrenia, CNV con deleciones grandes  $\geq 500$  kb, y carga total de CNV. Se compararon las puntuaciones de riesgo poligénico (PRS) medias entre sujetos de estudio con y sin CNV poco comunes, y se modelaron los efectos conjuntos de las PRS y las CNV en la causación de esquizofrenia utilizando regresión logística.

**Resultados:** Los sujetos de caso con esquizofrenia que portaban CNV de riesgo tuvieron un riesgo poligénico inferior

que los sujetos de caso sin CNV de riesgo, pero un riesgo más alto que los sujetos control. Para los sujetos de caso que portaban CNV de riesgo conocido, la puntuación de riesgo poligénico fue reducida en proporción al tamaño de efecto del CNV. La deleción 22q11.2 requirió de poca PRS añadida para producir esquizofrenia. Las deleciones grandes y la carga aumentada de CNV también se asociaron a un menor riesgo poligénico en los sujetos de caso con esquizofrenia, pero no en los sujetos control o después de quitar los portadores de CNV de riesgo conocido.

**Conclusiones:** Los autores encontraron evidencia de los efectos interactivos de la PRS y las CNV previamente asociados al riesgo de esquizofrenia, y los resultados para las deleciones grandes y la carga total de CNV apoyan un modelo aditivo. Estos hallazgos permiten un mejor entendimiento de la arquitectura genética de la esquizofrenia mostrando cómo actúan e interactúan diferentes factores de riesgo genético establecido para influir en la formación de la esquizofrenia.

(*Am J Psychiatry* 2019; 176:29–35)

# Contribuciones de los alelos de riesgo de esquizofrenia y de la victimización por pares en la adolescencia al desarrollo temprano de trayectorias de salud mental

Lucy Riglin, Ph.D., Gemma Hammerton, Ph.D., Jon Heron, Ph.D., Stephan Collishaw, Ph.D., Louise Arseneault, Ph.D., Ajay K. Thapar, M.R.C.G.P., Ph.D., Barbara Maughan, Ph.D., Michael C. O'Donovan, F.R.C.Psych., Ph.D., Anita Thapar, F.R.C.Psych., Ph.D.

**Objetivo:** Los estudios de gemelos sugieren que los factores genéticos contribuyen a la continuidad en los problemas de salud mental y que los factores del entorno son el factor que más contribuye al cambio del desarrollo. Los autores investigaron la influencia de los alelos de riesgo psiquiátrico en las trayectorias de salud mental de inicio temprano y si las trayectorias eran después modificadas por la exposición a la victimización en la infancia.

**Método:** La muestra fue una cohorte prospectiva del Reino Unido basada en la población, el Estudio Longitudinal Avon de Padres e Hijos (*Avon Longitudinal Study of Parents and Children*). Se estimaron las trayectorias de desarrollo de problemas emocionales en la infancia (aproximadamente entre los 4 y 8 años) y en la adolescencia (aproximadamente entre los 12 y los 17 años). Los alelos de riesgo psiquiátrico se indexaron por las puntuaciones de riesgo poligénico (PRS) para esquizofrenia utilizando resultados de estudios de asociación del genoma completo del Consorcio de Genómica Psiquiátrica (*Psychiatric Genomics Consortium*). La victimización crónica por parte de pares en la infancia (entre los 8,5 y los 10,5 años) se evaluó como un índice de exposición al entorno. Los individuos con suficientes datos de problemas

emocionales, la puntuación de riesgo poligénico, y victimización fueron incluidos en los análisis principales (N=3.988).

**Resultados:** Las puntuaciones de riesgo poligénico altas se asociaron a una trayectoria de problemas emocionales crecientes de inicio temprano (*odds ratio*=1,18; IC 95%=1,02–1,36) en comparación con una trayectoria de problemas emocionales menores estables. La subsiguiente exposición a la victimización aumentó la probabilidad de pasar de una trayectoria de problemas emocionales menores estables durante la infancia (antes de la exposición) a una trayectoria creciente en la adolescencia (después de la exposición) (*odds ratio*=2,95; IC 95%=1,48–4,53).

**Conclusiones:** Mientras el desarrollo temprano de los problemas asociados estuvo asociado al riesgo genético (alelos de riesgo de esquizofrenia), el subsiguiente curso de los problemas emocionales para los que de otra manera podrían haber seguido una trayectoria más favorable, fue alterado por la exposición a la victimización por pares, que es una exposición ambiental potencialmente modificable.

(*Am J Psychiatry* 2019; 176:36–43)

# Biomarcadores electroencefalográficos para la predicción de la respuesta al tratamiento del trastorno depresivo mayor: Un meta-análisis

Alik S. Widge, M.D., Ph.D., M. Taha Bilge, Ph.D., Rebecca Montana, B.A., Weilynn Chang, B.A., Carolyn I. Rodriguez, M.D., Ph.D., Thilo Deckersbach, Ph.D., Linda L. Carpenter, M.D., Ned H. Kalin, M.D., Charles B. Nemeroff, M.D., Ph.D.

**Objetivo:** Una reducción de los ensayos de tratamiento no exitosos podría mejorar el tratamiento de la depresión. La electroencefalografía cuantitativa (QEEG) puede predecir la respuesta al tratamiento y está siendo comercializada para este fin. Los autores buscaron cuantificar la confiabilidad de la QEEG para la predicción de la respuesta en la enfermedad depresiva y para identificar las limitaciones metodológicas de la evidencia disponible.

**Método:** Los autores condujeron un meta-análisis de precisión diagnóstica para la QEEG en la enfermedad depresiva, con base en artículos publicados entre enero de 200 y noviembre de 2017. La revisión incluyó todos los artículos que utilizaron QEEG para predecir la respuesta durante un episodio depresivo mayor, independientemente de la población de pacientes, el tratamiento o el marcador de QEEG. El resultado meta-analítico primario fue la precisión para predecir la respuesta al tratamiento de la depresión, expresado como sensibilidad, especificidad y el logaritmo del *odds ratio* del diagnóstico. Los evaluadores también juzgaron cada artículo según los indicadores de buenas prácticas de investigación.

**Resultados:** En 76 artículos que reportan 81 biomarcadores, las estimaciones meta-analíticas mostraron una sensibilidad de 0,72 (IC 95%=0,67–0,76) y una especificidad de 0,68 (IC 95%=0,63–0,73). El logaritmo del *odds ratio* del diagnóstico fue 1,89 (IC 95%=1,56–2,21), y el área bajo la curva del operador receptivo fue 0,76 (IC 95%=0,71–0,80). Ningún biomarcador de QEEG específico o tratamiento específico mostró mayor poder predictivo que el estimado de todos los estudios en una meta-regresión. El análisis de gráficos de embudo sugirió un sesgo sustancial de las publicaciones. La mayoría de los estudios no utilizaron prácticas ideales.

**Conclusiones:** La QEEG no parece ser clínicamente confiable para predecir la respuesta al tratamiento de depresión, ya que la literatura es limitada por el reporte insuficiente de resultados negativos, una falta de validación fuera de la muestra e insuficiente réplica directa de hallazgos previos. Hasta que no se ponga remedio a estas limitaciones, no se recomienda la QEEG para guiar la selección de tratamiento psiquiátrico.

(*Am J Psychiatry* 2019; 176:44–56)

# Marcadores de neuroimágenes estructurales multimodales del desarrollo del cerebro y los síntomas de TDAH

Gareth Ball, Ph.D., Charles B. Malpas, Ph.D., Sila Genc, M.Sc., Daryl Efron, M.D., F.R.A.C.P., Emma Sciberras, D.Psych., Vicki Anderson, Ph.D., Jan M. Nicholson, Ph.D., Timothy J. Silk, Ph.D.

**Objetivo:** El trastorno por déficit de atención e hiperactividad (TDAH) es un trastorno multifactorial con diversos factores de riesgo y comorbilidades asociados. En este estudio, los autores se propusieron entender el TDAH desde una perspectiva dimensional e identificar los correlatos neuroanatómicos de los rasgos y los comportamientos que abarcan los criterios diagnósticos.

**Método:** Se recogieron datos de neuroimágenes multimodales y datos cognitivos y clínicos de informantes múltiples en una cohorte pediátrica fenotipificada densamente (N=160; 70 con TDAH; rango de edad, 9–12 años). El análisis multivariado identificó asociaciones entre factores clínicos y cognitivos y marcadores de neuroimágenes multimodales (en el volumen de los tejidos, el grosor cortical, el área cortical y la microestructura e la sustancia blanca). Los marcadores de imágenes resultantes fueron validados en una cohorte independiente (N=231; 132 con TDAH; rango de edad, 7–18 años).

**Resultados:** Se identificaron cuatro patrones nuevos de variación neuroanatómica que estaban relacionados con la variación fenotípica. El primer patrón de imágenes capturó

la asociación del tamaño del cráneo al sexo, el estatus socio-económico y el desempeño en matemáticas y lectura. El segundo patrón capturó la variación asociada al desarrollo y mostró que los individuos con desarrollo retrasado tenían mayor probabilidad de recibir medicación para el TDAH. El tercer patrón estuvo asociado a la hiperactividad, mayores comorbilidades, peor cognición, menor educación de los padres y calidad de vida inferior. El cuarto patrón estuvo asociado a un perfil particular de peor cognición e irritabilidad independiente del TDAH: Los autores demostraron además que estos patrones de imágenes podían predecir variación en la edad y los síntomas de TDAH en una cohorte independiente.

**Conclusiones:** Los hallazgos sugieren que la presentación del TDAH puede surgir de una combinación de varios factores clínicos, de desarrollo o cognitivos, cada uno con un fundamento neuroanatómico claro. Esto informa los fundamentos neurobiológicos del TDAH y resalta el valor de los datos fenotípicos detallados para comprender la neurobiología subyacente de los trastornos del neurodesarrollo.

(*Am J Psychiatry* 2019; 176:57–66)

## Mecanismos cerebrales de orientación de la atención después de la frustración: Asociaciones a la irritabilidad y la edad en los jóvenes

Wan-Ling Tseng, Ph.D., Christen M. Deveney, Ph.D., Joel Stoddard, M.D., Katharina Kircanski, Ph.D., Anna E. Frackman, M.D., Jennifer Y. Yi, M.A., Derek Hsu, M.D., Elizabeth Moroney, B.A., Laura Machlin, B.A., Laura Donahue, B.A., Alexandra Roule, B.A., Gretchen Perhamus, B.A., Richard C. Reynolds, M.S., Roxann Roberson-Nay, Ph.D., John M. Hetteima, M.D., Ph.D., Kenneth E. Towbin, M.D., Argyris Stringaris, M.D., Ph.D., Daniel S. Pine, M.D., Melissa A. Brotman, Ph.D., Ellen Leibenluft, M.D.

**Objetivo:** La irritabilidad en la infancia es un problema común, incapacitante, con manifestaciones que cambian en relación con la edad y que predicen resultados adversos a largo plazo. Sin embargo, es necesaria más investigación de correlatos neurales en general y específicos de cada edad. Dado que los jóvenes con irritabilidad exhiben respuestas exageradas a los estímulos frustrantes, los autores utilizaron un paradigma IRM funcional (IRMf) de frustración para examinar las asociaciones entre la irritabilidad y la activación neural y pusieron a prueba el efecto moderador de la edad.

**Método:** Los autores estudiaron una muestra transdiagnóstica de 195 jóvenes con diferentes niveles de irritabilidad (trastorno de desregulación disruptiva del ánimo, N=52; trastorno de ansiedad, N=42; trastorno por déficit de atención e hiperactividad, N=40; y voluntarios sanos N=61). La irritabilidad se midió con informes de padres e hijos en el Índice de Reactividad Afectiva (*Affective Reactivity Index*). El paradigma IRMf fue una tarea de atención con claves (*cued-attention*) que diferenciaba la actividad neural en respuesta a la frustración (feedback manipulado) de la actividad durante la orientación de la atención en el ensayo después de la frustración.

**Resultados:** Análisis de activación de todo el cerebro revela-

ron asociaciones a la irritabilidad durante la orientación de la atención después de la frustración. La irritabilidad estuvo asociada positivamente a la activación frontal-estriatal, concretamente en la corteza prefrontal dorsolateral, el giro frontal inferior y el caudado. La edad moderó la asociación entre la irritabilidad y la activación en algunas regiones frontales y posteriores (la corteza cingulada anterior, el giro frontal medio, el cúneo, el precúneo y el lóbulo parietal superior [ $F=19,04-28.51$ ,  $df=1, 189$ ,  $\eta^2$  parcial cuadrada= $0,09-0,13$ ]). Específicamente, una mayor irritabilidad estuvo relacionada más estrechamente a la activación aumentada en jóvenes de menor edad en comparación con jóvenes de mayor edad.

**Conclusiones:** Después de la frustración, los niveles de irritabilidad estuvieron correlacionados con la actividad en los sistemas neurales que median la orientación de la atención, la regulación de emociones *top-down*, y la ejecución motora. Aunque la mayoría de las asociaciones fueron independientes de la edad, la disfunción en las regiones de la corteza cingulada anterior y posterior fue más pronunciada en niños pequeños con irritabilidad.

(*Am J Psychiatry* 2019; 176:67-76)
