# The American Journal of Psychiatry

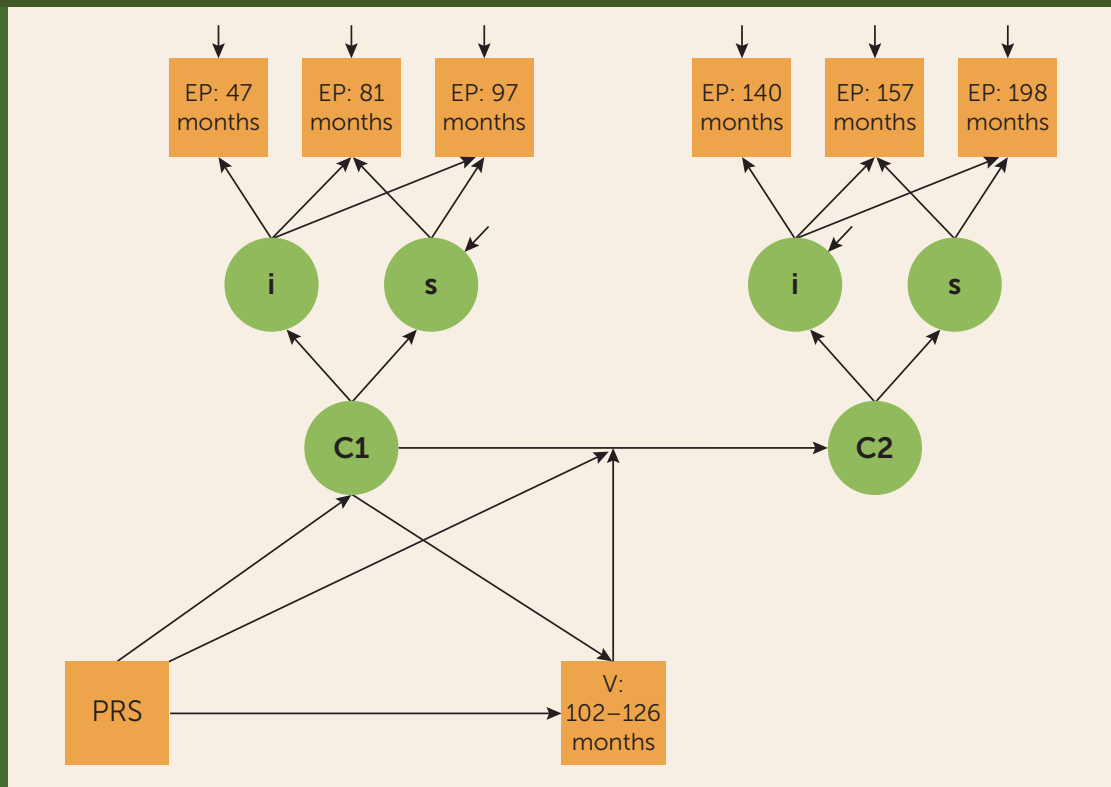

Thinking About Schizophrenia in an Era of Genomic Medicine

Schizophrenia Polygenic Risk Score as a Predictor of Antipsychotic Efficacy in First-Episode Psychosis

Joint Contributions of Rare Copy Number Variants and Common SNPs to Risk for Schizophrenia

Developmental Contributions of Schizophrenia Risk Alleles and Childhood Peer Victimization to Early-Onset Mental Health Trajectories
